# Supplementary material for: Ion transport mechanisms in pectin-containing EC–LiTFSI electrolytes
Source: Royal Society of Chemistry journal article supplement (doi:10.1039/d3nr04029a), 2024-01-01
Supplement: d3nr04029a1.pdf [file d3nr04029a1.pdf]

**Supporting information for:**  
**Ion Transport Mechanisms in Pectin-containing EC-LiTFSI Electrolytes**

*Sipra Mohapatra<sup>1</sup>, Hema Teherpuria<sup>1</sup>, Sapta Sindhu Paul Chowdhury<sup>1</sup>, Suleman Jalilahmad Ansari<sup>1</sup>, Prabhat K. Jaiswal<sup>1</sup>, Roland R. Netz<sup>2</sup>, and Santosh Mogurampelly<sup>1,2,\*</sup>*

<sup>1</sup>Department of Physics, Indian Institute of Technology Jodhpur, Karwar, Rajasthan 342037, India.

<sup>2</sup>Fachbereich Physik, Freie Universität Berlin, 14195 Berlin, Germany.

\*Corresponding Author: [santosh@iitj.ac.in](mailto:santosh@iitj.ac.in)

**Abstract:**

The supplementary document contains **(S1)** The visual impression of the simulated systems **(S1.1)** The force field parameters for pectin polymer (Table **ST1**: bonded, non-bonded force field parameters for pectin polymer) (Table **ST2**: System details) **(S2)** Radial distribution function and coordination number **(S3)** Ion association probability **(S4)** Mean squared displacement (Table **ST3**: Diffusion coefficient calculations from MSD curves), **(S5)** Calculation of viscosity and notes on numerical issues, **(S6)** Diffusion coefficient scaling with  $\eta$  and  $\tau_c$ , **(S7)** The ion-pair correlation function, **(S8)** Pectin loading dependency of  $\sigma_{NE}$ ,  $\eta$ ,  $P(0)$ ,  $P(1)$  and  $P(2)$  and an intuitive objective function  $f(\sigma_{NE}, P(0), P(1)) \sim \sigma_{NE} P^a(0) / P^b(1)$ , and **(S9)** Transference number with wt. % of pectin.

## S1: The Visual Impression of the Simulated Systems:

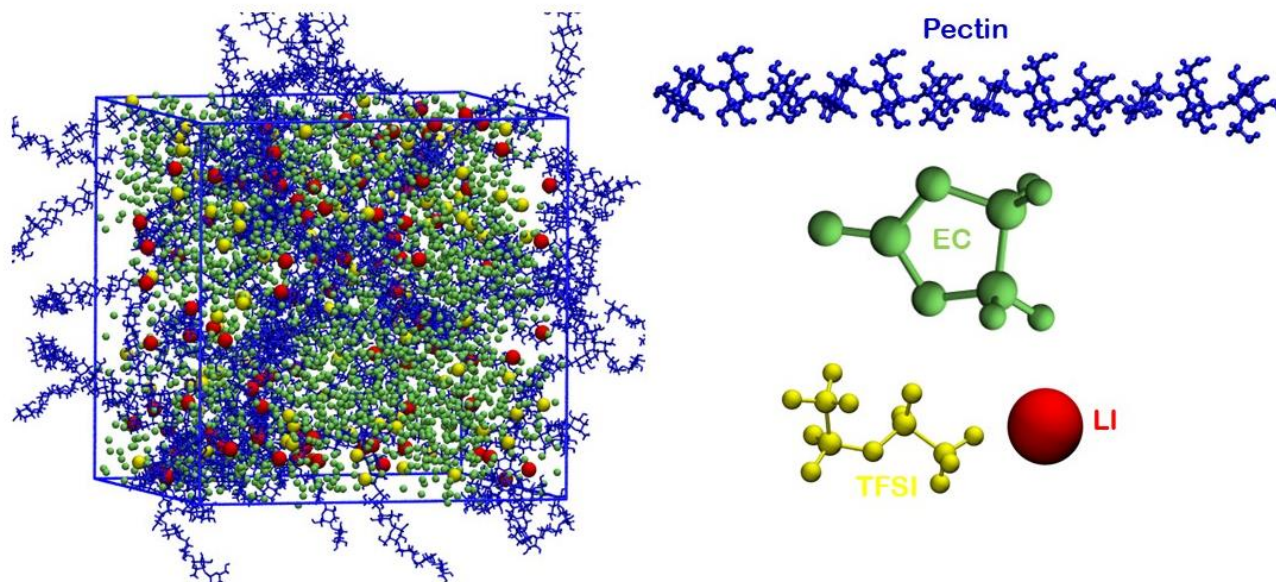

**Figure S1:** Equilibrated snapshot (collected at 300 ns and 425 K) of the pectin-EC-LiTFSI electrolyte system at a loading of pectin 10 wt. % generated with VMD visualization tool.<sup>1</sup>

### S1.1. The Force Field Parameters for Pectin Polymer

The non-bonded parameters are taken directly from GLYCAM06J force field parameter set.<sup>2</sup>

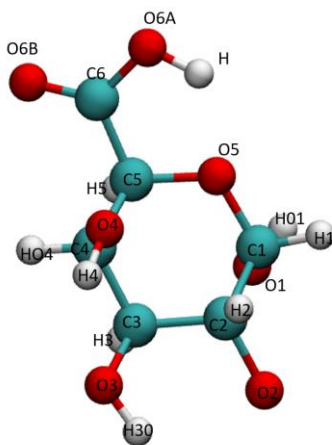

**Table ST1: Bonded, Non-bonded Force Field Parameters for Pectin Polymer**

| Atom type | $\sigma$ (nm) | $\epsilon$ (kJ mol <sup>-1</sup> ) | Ref.                   | $q$ (e) | Ref.      |
|-----------|---------------|------------------------------------|------------------------|---------|-----------|
| C1        | 0.339         | 0.458                              | GLYCAM06J <sup>2</sup> | 0.074   | This work |
| C2        | 0.339         | 0.458                              | GLYCAM06J <sup>2</sup> | 0.299   | This work |
| C3        | 0.339         | 0.458                              | GLYCAM06J <sup>2</sup> | 0.033   | This work |
| C4        | 0.339         | 0.458                              | GLYCAM06J <sup>2</sup> | 0.324   | This work |
| C5        | 0.339         | 0.458                              | GLYCAM06J <sup>2</sup> | -0.385  | This work |
| C6        | 0.339         | 0.458                              | GLYCAM06J <sup>2</sup> | 0.849   | This work |
| H1        | 0.229         | 0.066                              | GLYCAM06J <sup>2</sup> | 0.116   | This work |
| H1O       | 0.035         | 0.126                              | GLYCAM06J <sup>2</sup> | 0.376   | This work |
| H2        | 0.247         | 0.066                              | GLYCAM06J <sup>2</sup> | 0.087   | This work |
| H2O       | 0.035         | 0.126                              | GLYCAM06J <sup>2</sup> | 0.389   | This work |
| H3        | 0.247         | 0.066                              | GLYCAM06J <sup>2</sup> | 0.099   | This work |
| H3O       | 0.035         | 0.126                              | GLYCAM06J <sup>2</sup> | 0.409   | This work |
| H4        | 0.247         | 0.066                              | GLYCAM06J <sup>2</sup> | 0.063   | This work |
| H4O       | 0.035         | 0.126                              | GLYCAM06J <sup>2</sup> | 0.404   | This work |
| H5        | 0.247         | 0.066                              | GLYCAM06J <sup>2</sup> | 0.175   | This work |
| HO1       | 0.035         | 0.126                              | GLYCAM06J <sup>2</sup> | 0.434   | This work |
| O1        | 0.306         | 0.88                               | GLYCAM06J <sup>2</sup> | -0.581  | This work |
| O2        | 0.3           | 0.711                              | GLYCAM06J <sup>2</sup> | -0.617  | This work |
| O3        | 0.3           | 0.711                              | GLYCAM06J <sup>2</sup> | -0.615  | This work |
| O4        | 0.3           | 0.711                              | GLYCAM06J <sup>2</sup> | -0.339  | This work |
| O5        | 0.3           | 0.711                              | GLYCAM06J <sup>2</sup> | -0.257  | This work |
| O6A       | 0.3           | 0.711                              | GLYCAM06J <sup>2</sup> | -0.535  | This work |
| O6B       | 0.3           | 0.711                              | GLYCAM06J <sup>2</sup> | -0.545  | This work |

| Bond Types |    | Ref: gromacs_manual_5.0.4 page number 138, table 5.5 |             |                                                |           |
|------------|----|------------------------------------------------------|-------------|------------------------------------------------|-----------|
| i          | j  | function                                             | $b_0$ (nm); | $k_b$ (kJ mol <sup>-1</sup> nm <sup>-2</sup> ) | Ref.      |
| HO1        | O1 | 1                                                    | 0.097       | 196086.09                                      | This work |
| O1         | C1 | 1                                                    | 0.142       | 118925.01                                      | This work |

|     |     |   |       |           |           |
|-----|-----|---|-------|-----------|-----------|
| C1  | C2  | 1 | 0.153 | 117690.1  | This work |
| C1  | H1  | 1 | 0.110 | 125620.67 | This work |
| C1  | O5  | 1 | 0.142 | 112750.06 | This work |
| C2  | O2  | 1 | 0.142 | 126537.38 | This work |
| C2  | H2  | 1 | 0.110 | 128339.14 | This work |
| C2  | C3  | 1 | 0.153 | 113959.82 | This work |
| C3  | H3  | 1 | 0.110 | 120601.42 | This work |
| C3  | O3  | 1 | 0.143 | 124864.28 | This work |
| C3  | C4  | 1 | 0.153 | 115552.62 | This work |
| C4  | H4  | 1 | 0.110 | 122602.08 | This work |
| C4  | C5  | 1 | 0.153 | 110645.46 | This work |
| C4  | O4  | 1 | 0.142 | 127070.3  | This work |
| C5  | H5  | 1 | 0.110 | 125281.26 | This work |
| C5  | O5  | 1 | 0.144 | 111768.7  | This work |
| C5  | C6  | 1 | 0.153 | 102048.09 | This work |
| C6  | O6A | 1 | 0.134 | 154705.91 | This work |
| C6  | O6B | 1 | 0.121 | 321628.31 | This work |
| O6A | H1O | 1 | 0.097 | 183897.09 | This work |
| O4  | H4O | 1 | 0.097 | 193553.97 | This work |
| O3  | H3O | 1 | 0.097 | 193097.12 | This work |
| O2  | H2O | 1 | 0.097 | 191439.8  | This work |
| O4  | C1  | 1 | 0.139 | 149781.22 | This work |

| Angle Types |    | Ref: gromacs_manual_5.0.4 page number 138, table 5.5 |          |                  |                                                |               |                                                  |           |
|-------------|----|------------------------------------------------------|----------|------------------|------------------------------------------------|---------------|--------------------------------------------------|-----------|
| i           | j  | k                                                    | function | $\theta_0$ (deg) | $k_0$ ( $\text{kJ mol}^{-1} \text{rad}^{-2}$ ) | $r_{13}$ (nm) | $k_{UB}$ ( $\text{kJ mol}^{-1} \text{nm}^{-2}$ ) | Ref.      |
| HO1         | O1 | C1                                                   | 5        | 109.347          | 180.639                                        | 0             | 0                                                | This work |
| O1          | C1 | C2                                                   | 5        | 106.898          | 450.234                                        | 0             | 0                                                | This work |
| H1          | C1 | C2                                                   | 5        | 110.811          | 237.645                                        | 0             | 0                                                | This work |
| C2          | C1 | O5                                                   | 5        | 111.427          | 1124.423                                       | 0             | 0                                                | This work |
| O1          | C1 | H1                                                   | 5        | 110.821          | 269.745                                        | 0             | 0                                                | This work |
| O1          | C1 | O5                                                   | 5        | 112.148          | 471.801                                        | 0             | 0                                                | This work |

|     |         |     |   |         |          |   |   |           |
|-----|---------|-----|---|---------|----------|---|---|-----------|
| H1  | C1      | O5  | 5 | 104.810 | 269.463  | 0 | 0 | This work |
| C1  | C2      | O2  | 5 | 111.669 | 380.449  | 0 | 0 | This work |
| C1  | C2      | H2  | 5 | 107.975 | 239.426  | 0 | 0 | This work |
| C1  | C2      | C3  | 5 | 111.002 | 1255.179 | 0 | 0 | This work |
| H2  | C2      | O2  | 5 | 106.156 | 264.376  | 0 | 0 | This work |
| C3  | C2      | O2  | 5 | 111.26  | 372.586  | 0 | 0 | This work |
| H2  | C2      | C3  | 5 | 108.557 | 239.988  | 0 | 0 | This work |
| H3  | C3      | O3  | 5 | 110.055 | 268.286  | 0 | 0 | This work |
| C2  | C3      | H3  | 5 | 109.371 | 238.441  | 0 | 0 | This work |
| H3  | C3      | C4  | 5 | 108.692 | 235.478  | 0 | 0 | This work |
| C2  | C3      | O3  | 5 | 110.902 | 379.229  | 0 | 0 | This work |
| C4  | C3      | O3  | 5 | 107.258 | 388.506  | 0 | 0 | This work |
| C2  | C3      | C4  | 5 | 110.519 | 1255.179 | 0 | 0 | This work |
| C3  | C4      | H4  | 5 | 109.644 | 229.586  | 0 | 0 | This work |
| H4  | C4      | C5  | 5 | 107.891 | 227.911  | 0 | 0 | This work |
| H4  | C4      | O4  | 5 | 110.692 | 267.557  | 0 | 0 | This work |
| C3  | C4      | C5  | 5 | 108.947 | 1255.179 | 0 | 0 | This work |
| C3  | C4      | O4  | 5 | 111.278 | 406.091  | 0 | 0 | This work |
| C5  | C4      | O4  | 5 | 108.302 | 396.739  | 0 | 0 | This work |
| H5  | C5      | O5  | 5 | 109.764 | 278.376  | 0 | 0 | This work |
| H5  | C5      | C6  | 5 | 106.897 | 209.052  | 0 | 0 | This work |
| C4  | C5      | H5  | 5 | 108.671 | 235.004  | 0 | 0 | This work |
| C6  | C5      | O5  | 5 | 108.353 | 459.009  | 0 | 0 | This work |
| C4  | C5      | O5  | 5 | 112.098 | 1115.862 | 0 | 0 | This work |
| C4  | C5      | C6  | 5 | 110.923 | 327.898  | 0 | 0 | This work |
| C5  | C6      | O6A | 5 | 116.12  | 446.296  | 0 | 0 | This work |
| C5  | C6      | O6B | 5 | 121.273 | 383.507  | 0 | 0 | This work |
| O6A | C6      | O6B | 5 | 122.604 | 438.97   | 0 | 0 | This work |
| C6  | O6<br>A | H1O | 5 | 108.239 | 211.453  | 0 | 0 | This work |
| C1  | O5      | C5  | 5 | 115.565 | 841.824  | 0 | 0 | This work |
| C4  | O4      | H4O | 5 | 107.212 | 193.249  | 0 | 0 | This work |
| C3  | O3      | H3O | 5 | 107.778 | 188.268  | 0 | 0 | This work |

|    |    |     |   |         |         |   |   |           |
|----|----|-----|---|---------|---------|---|---|-----------|
| C2 | O2 | H2O | 5 | 107.517 | 196.578 | 0 | 0 | This work |
| O4 | C1 | C2  | 5 | 111.915 | 480.242 | 0 | 0 | This work |
| O4 | C1 | H1  | 5 | 108.716 | 269.634 | 0 | 0 | This work |
| O4 | C1 | O5  | 5 | 117.376 | 455.385 | 0 | 0 | This work |
| C4 | O4 | C1  | 5 | 113.244 | 584.861 | 0 | 0 | This work |

| <b>Dihedral types</b> |          | Ref: gromacs_manual_5.0.4 page number 139, table 5.5 |          |                 |                |                                  |                     |                        |
|-----------------------|----------|------------------------------------------------------|----------|-----------------|----------------|----------------------------------|---------------------|------------------------|
| <b>i</b>              | <b>j</b> | <b>k</b>                                             | <b>l</b> | <b>function</b> | $\phi_s$ (Deg) | $k_\phi$ (kJ mol <sup>-1</sup> ) | <b>Multiplicity</b> | <b>Ref.</b>            |
| HO1                   | O1       | C1                                                   | C2       | 9               | 0              | 0.753                            | 3                   | GLYCAM06J <sup>2</sup> |
| HO1                   | O1       | C1                                                   | H1       | 9               | 0              | 0.753                            | 3                   | GLYCAM06J <sup>2</sup> |
| HO1                   | O1       | C1                                                   | O5       | 9               | 0              | 0.753                            | 3                   | GLYCAM06J <sup>2</sup> |
| O1                    | C1       | C2                                                   | O2       | 9               | 0              | -0.418                           | 1                   | GLYCAM06J <sup>2</sup> |
| O1                    | C1       | C2                                                   | H2       | 9               | 0              | 0.209                            | 3                   | GLYCAM06J <sup>2</sup> |
| O1                    | C1       | C2                                                   | C3       | 9               | 0              | 0.418                            | 3                   | GLYCAM06J <sup>2</sup> |
| H1                    | C1       | C2                                                   | O2       | 9               | 0              | 0.209                            | 3                   | GLYCAM06J <sup>2</sup> |
| H1                    | C1       | C2                                                   | H2       | 9               | 0              | 0.711                            | 3                   | GLYCAM06J <sup>2</sup> |
| H1                    | C1       | C2                                                   | C3       | 9               | 0              | 0.628                            | 3                   | GLYCAM06J <sup>2</sup> |
| O5                    | C1       | C2                                                   | O2       | 9               | 0              | -4.602                           | 1                   | GLYCAM06J <sup>2</sup> |
| O5                    | C1       | C2                                                   | H2       | 9               | 0              | 0.209                            | 3                   | GLYCAM06J <sup>2</sup> |
| O5                    | C1       | C2                                                   | C3       | 9               | 0              | -1.130                           | 1                   | GLYCAM06J <sup>2</sup> |
| C2                    | C1       | O5                                                   | C5       | 9               | 0              | 0.669                            | 3                   | GLYCAM06J <sup>2</sup> |
| O1                    | C1       | O5                                                   | C5       | 9               | 0              | 4.017                            | 3                   | GLYCAM06J <sup>2</sup> |
| H1                    | C1       | O5                                                   | C5       | 9               | 0              | 0.418                            | 3                   | GLYCAM06J <sup>2</sup> |
| C1                    | C2       | O2                                                   | H2O      | 9               | 0              | 0.753                            | 3                   | GLYCAM06J <sup>2</sup> |
| H2                    | C2       | O2                                                   | H2O      | 9               | 0              | 0.753                            | 3                   | GLYCAM06J <sup>2</sup> |
| C3                    | C2       | O2                                                   | H2O      | 9               | 0              | 0.753                            | 3                   | GLYCAM06J <sup>2</sup> |
| C1                    | C2       | C3                                                   | H3       | 9               | 0              | 0.628                            | 3                   | GLYCAM06J <sup>2</sup> |
| C1                    | C2       | C3                                                   | O3       | 9               | 0              | 0.418                            | 3                   | GLYCAM06J <sup>2</sup> |
| C1                    | C2       | C3                                                   | C4       | 9               | 0              | 1.883                            | 1                   | GLYCAM06J <sup>2</sup> |
| O2                    | C2       | C3                                                   | H3       | 9               | 0              | 0.209                            | 3                   | GLYCAM06J <sup>2</sup> |
| O2                    | C2       | C3                                                   | O3       | 9               | 0              | -0.418                           | 1                   | GLYCAM06J <sup>2</sup> |
| O2                    | C2       | C3                                                   | C4       | 9               | 0              | 0.418                            | 3                   | GLYCAM06J <sup>2</sup> |
| H2                    | C2       | C3                                                   | H3       | 9               | 0              | 0.711                            | 3                   | GLYCAM06J <sup>2</sup> |

|    |    |    |     |   |   |       |   |                        |
|----|----|----|-----|---|---|-------|---|------------------------|
| H2 | C2 | C3 | O3  | 9 | 0 | 0.209 | 3 | GLYCAM06J <sup>2</sup> |
| H2 | C2 | C3 | C4  | 9 | 0 | 0.628 | 3 | GLYCAM06J <sup>2</sup> |
| H3 | C3 | O3 | H3O | 9 | 0 | 0.753 | 3 | GLYCAM06J <sup>2</sup> |
| C2 | C3 | O3 | H3O | 9 | 0 | 0.753 | 3 | GLYCAM06J <sup>2</sup> |
| C4 | C3 | O3 | H3O | 9 | 0 | 0.753 | 3 | GLYCAM06J <sup>2</sup> |
| H3 | C3 | C4 | H4  | 9 | 0 | 0.711 | 3 | GLYCAM06J <sup>2</sup> |
| H3 | C3 | C4 | C5  | 9 | 0 | 0.628 | 3 | GLYCAM06J <sup>2</sup> |
| H3 | C3 | C4 | O4  | 9 | 0 | 0.209 | 3 | GLYCAM06J <sup>2</sup> |
| O3 | C3 | C4 | H4  | 9 | 0 | 0.209 | 3 | GLYCAM06J <sup>2</sup> |
| O3 | C3 | C4 | C5  | 9 | 0 | 0.418 | 3 | GLYCAM06J <sup>2</sup> |
| O3 | C3 | C4 | O4  | 9 | 0 | 1.046 | 2 | GLYCAM06J <sup>2</sup> |
| C2 | C3 | C4 | H4  | 9 | 0 | 0.628 | 3 | GLYCAM06J <sup>2</sup> |
| C2 | C3 | C4 | C5  | 9 | 0 | 1.883 | 1 | GLYCAM06J <sup>2</sup> |
| C2 | C3 | C4 | O4  | 9 | 0 | -1.13 | 1 | GLYCAM06J <sup>2</sup> |
| H4 | C4 | C5 | H5  | 9 | 0 | 0.711 | 3 | GLYCAM06J <sup>2</sup> |
| H4 | C4 | C5 | O5  | 9 | 0 | 0.209 | 3 | GLYCAM06J <sup>2</sup> |
| H4 | C4 | C5 | C6  | 9 | 0 | 0.418 | 3 | GLYCAM06J <sup>2</sup> |
| C3 | C4 | C5 | H5  | 9 | 0 | 0.628 | 3 | GLYCAM06J <sup>2</sup> |
| C3 | C4 | C5 | O5  | 9 | 0 | -1.13 | 1 | GLYCAM06J <sup>2</sup> |
| C3 | C4 | C5 | C6  | 9 | 0 | 1.883 | 1 | GLYCAM06J <sup>2</sup> |
| O4 | C4 | C5 | H5  | 9 | 0 | 0.209 | 3 | GLYCAM06J <sup>2</sup> |
| O4 | C4 | C5 | O5  | 9 | 0 | 1.674 | 2 | GLYCAM06J <sup>2</sup> |
| O4 | C4 | C5 | C6  | 9 | 0 | 0.418 | 2 | GLYCAM06J <sup>2</sup> |
| H4 | C4 | O4 | H4O | 9 | 0 | 0.753 | 3 | GLYCAM06J <sup>2</sup> |
| C3 | C4 | O4 | H4O | 9 | 0 | 0.753 | 3 | GLYCAM06J <sup>2</sup> |
| C5 | C4 | O4 | H4O | 9 | 0 | 0.753 | 3 | GLYCAM06J <sup>2</sup> |
| H5 | C5 | O5 | C1  | 9 | 0 | 1.13  | 3 | GLYCAM06J <sup>2</sup> |
| C6 | C5 | O5 | C1  | 9 | 0 | 1.339 | 3 | GLYCAM06J <sup>2</sup> |
| C4 | C5 | O5 | C1  | 9 | 0 | 0.669 | 3 | GLYCAM06J <sup>2</sup> |
| H5 | C5 | C6 | O6A | 9 | 0 | 0     | 1 | GLYCAM06J <sup>2</sup> |
| H5 | C5 | C6 | O6B | 9 | 0 | 0     | 1 | GLYCAM06J <sup>2</sup> |
| O5 | C5 | C6 | O6A | 9 | 0 | 0.084 | 1 | GLYCAM06J <sup>2</sup> |
| O5 | C5 | C6 | O6B | 9 | 0 | 0.084 | 1 | GLYCAM06J <sup>2</sup> |

|     |    |     |     |   |   |       |   |                        |
|-----|----|-----|-----|---|---|-------|---|------------------------|
| C4  | C5 | C6  | O6A | 9 | 0 | 0.021 | 1 | GLYCAM06J <sup>2</sup> |
| C4  | C5 | C6  | O6B | 9 | 0 | 0.021 | 1 | GLYCAM06J <sup>2</sup> |
| C5  | C6 | O6A | H1O | 9 | 0 | 0.753 | 3 | GLYCAM06J <sup>2</sup> |
| O6B | C6 | O6A | H1O | 9 | 0 | 0.753 | 3 | GLYCAM06J <sup>2</sup> |
| C3  | C4 | O4  | C1  | 9 | 0 | 0.669 | 3 | GLYCAM06J <sup>2</sup> |
| C5  | C4 | O4  | C1  | 9 | 0 | 0.669 | 3 | GLYCAM06J <sup>2</sup> |
| H4  | C4 | O4  | C1  | 9 | 0 | 1.13  | 3 | GLYCAM06J <sup>2</sup> |
| C4  | O4 | C1  | H1  | 9 | 0 | 0.418 | 3 | GLYCAM06J <sup>2</sup> |
| C4  | O4 | C1  | C2  | 9 | 0 | 0.669 | 3 | GLYCAM06J <sup>2</sup> |
| C4  | O4 | C1  | O5  | 9 | 0 | 4.017 | 3 | GLYCAM06J <sup>2</sup> |
| O4  | C1 | C2  | C3  | 9 | 0 | -1.13 | 1 | GLYCAM06J <sup>2</sup> |
| O4  | C1 | C2  | H2  | 9 | 0 | 0.209 | 3 | GLYCAM06J <sup>2</sup> |
| O4  | C1 | C2  | O2  | 9 | 0 | 1.046 | 2 | GLYCAM06J <sup>2</sup> |
| O4  | C1 | O5  | C5  | 9 | 0 | 4.017 | 3 | GLYCAM06J <sup>2</sup> |

**Table ST2: System Compositional Details**

| Pectin wt. % | No. of EC molecules | No. of pectin chains | No. of Li | No. of TFSI | Total No. of Atoms |
|--------------|---------------------|----------------------|-----------|-------------|--------------------|
| 50           | 2420                | 100                  | 100       | 100         | 53300              |
| 30           | 3388                | 60                   | 100       | 100         | 53580              |
| 10           | 4356                | 20                   | 100       | 100         | 53860              |
| 5            | 4598                | 10                   | 100       | 100         | 53930              |
| 3            | 4695                | 6                    | 100       | 100         | 53960              |
| 2            | 4743                | 4                    | 100       | 100         | 53970              |
| 1            | 4791                | 2                    | 100       | 100         | 53990              |
| 0.5          | 4816                | 1                    | 100       | 100         | 53995              |
| 0            | 4840                | 0                    | 100       | 100         | 54000              |

## S2: Radial Distribution Functions and Coordination Numbers

The structural properties of the electrolytes were studied by calculating the radial distribution function  $g(r)$  and coordination number  $CN(r)$  of anion and cation. Further, to investigate the interaction between the ion-ion and ion-polymer, we have calculated the RDF and  $CN(r)$  for different pairs such as  $Li-N_{TFSI}$ ,  $O_{EC}-Li$ ,  $O_{EC}-N_{TFSI}$ ,  $O_{pectin}-Li$ ,  $O_{pectin}-N_{TFSI}$ ,  $O_{pectin}-O_{EC}$ , etc.



We found sharp peaks in RDF for Li-O (pectin), Li-TFSI, and Li- (O)EC and broadened peaks for other pairs showing the strong interaction between lithium and oxygen units of other molecules. The coordination number supports the RDF results. To get a better idea, we have also calculated the ion association probability of the ions.

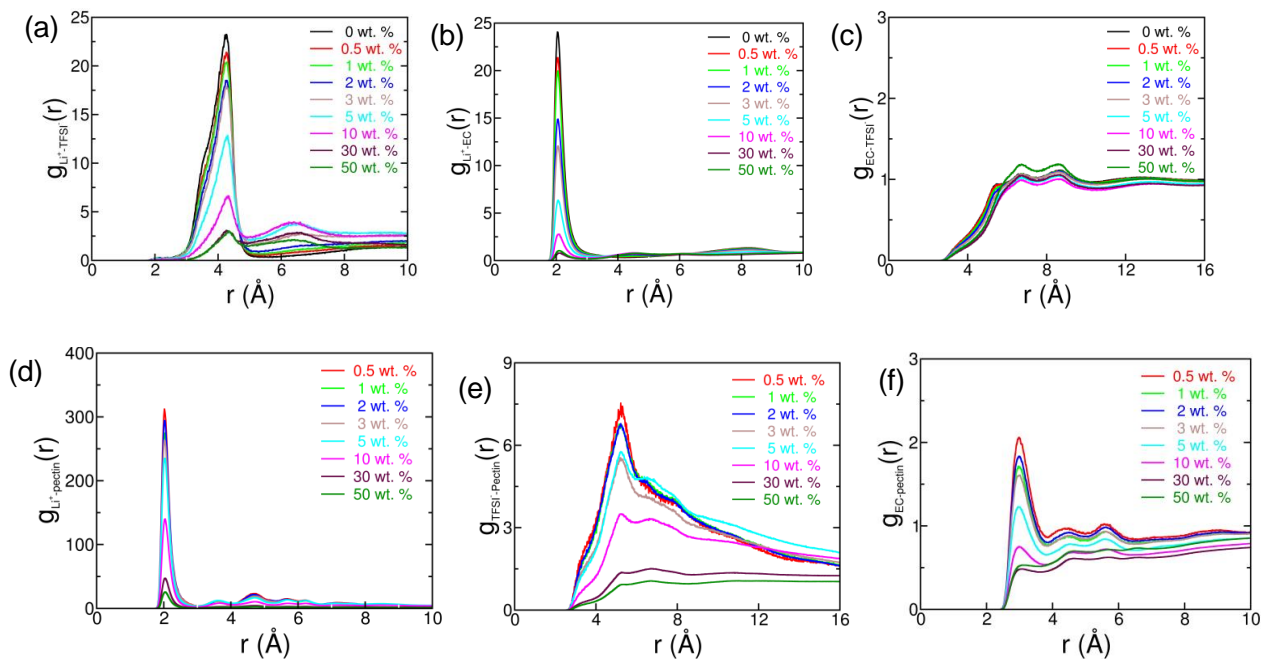

**Figure S2.1:** Radial distribution function and CN(r) for different atomic pairs such as Li- $N_{TFSI}$ , Li- $O_{EC}$ ,  $O_{EC}-N_{TFSI}$ , Li- $O_{pectin}$ ,  $N_{TFSI}-O_{pectin}$ ,  $O_{pectin}-O_{EC}$ .

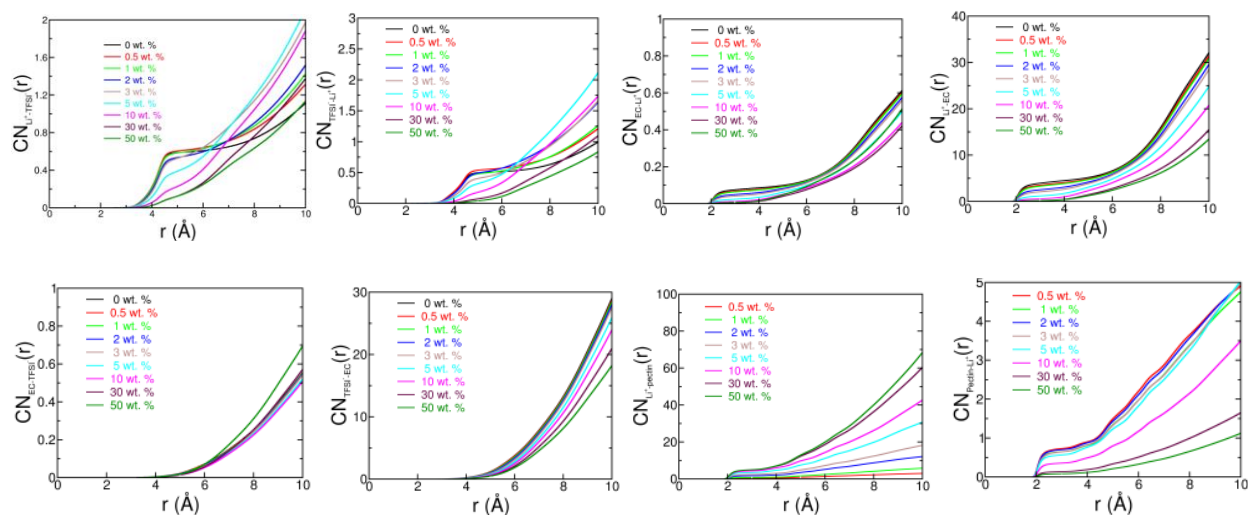

**Figure S2.2:** Coordination number of atomic pairs of Li, TFSI, EC molecule at different loadings of pectin.

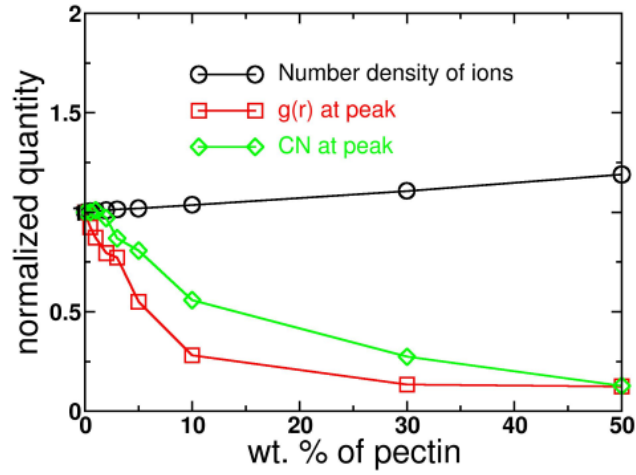

**Figure S2.3:** The normalized number density of ions,  $g(r)$  at first peak and  $CN(r)$  at first peak corresponding to the pairs Li-TFSI.

### S3: Ion-Association Probability

The  $P(n)$  is calculated using the formula  $P(n) = \frac{1}{N_{\text{frames}}} \sum_{i=1}^{N_{\text{frames}}} \sum_{j=1}^{N_{\text{ions}}} \frac{\delta_{n_i n_j}}{N_{\text{ions}}}$ , where  $\delta_{n_i n_j}$  is the Kronecker delta function to count  $n$  number of counterions within the first coordination shell of the ion  $j$ ,  $N_{\text{ions}}$  is the total number of ions,  $N_{\text{frames}}$  is the total number of frames. Here,  $\delta_{n_i n_j}$  is defined in such a way that  $\delta_{n_i n_j} = 1$  if  $n_i^{\text{th}}$  ion is found within the first coordination shell of  $n_j^{\text{th}}$  ion, and  $\delta_{n_i n_j} = 0$ , otherwise.

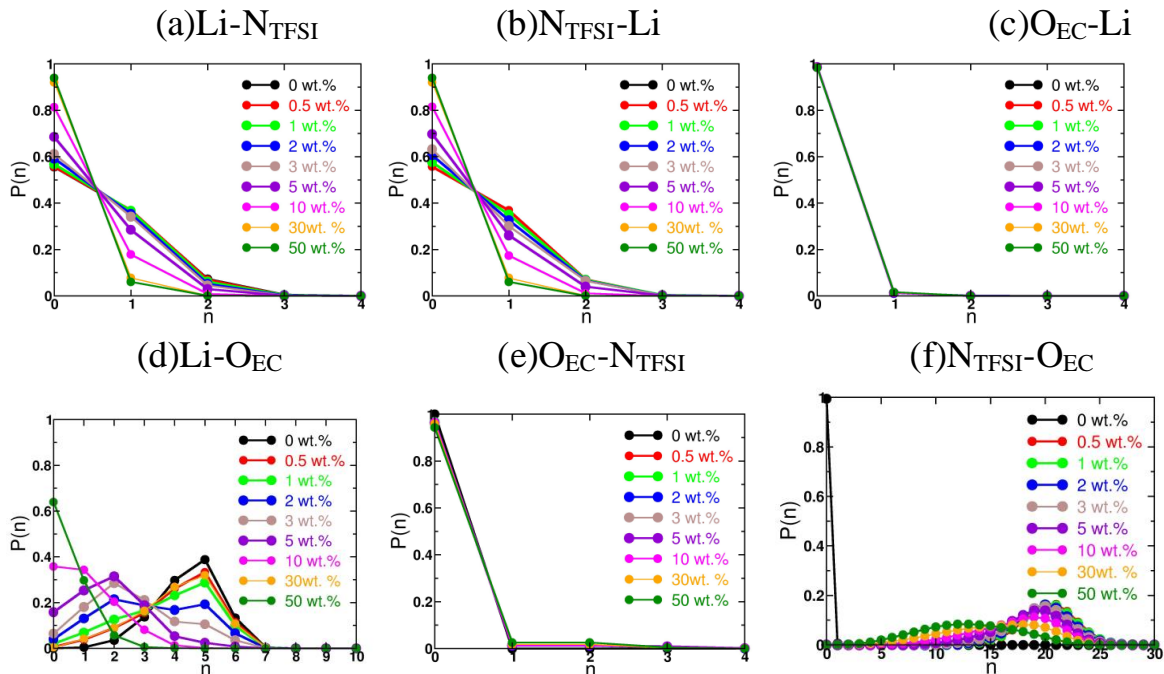

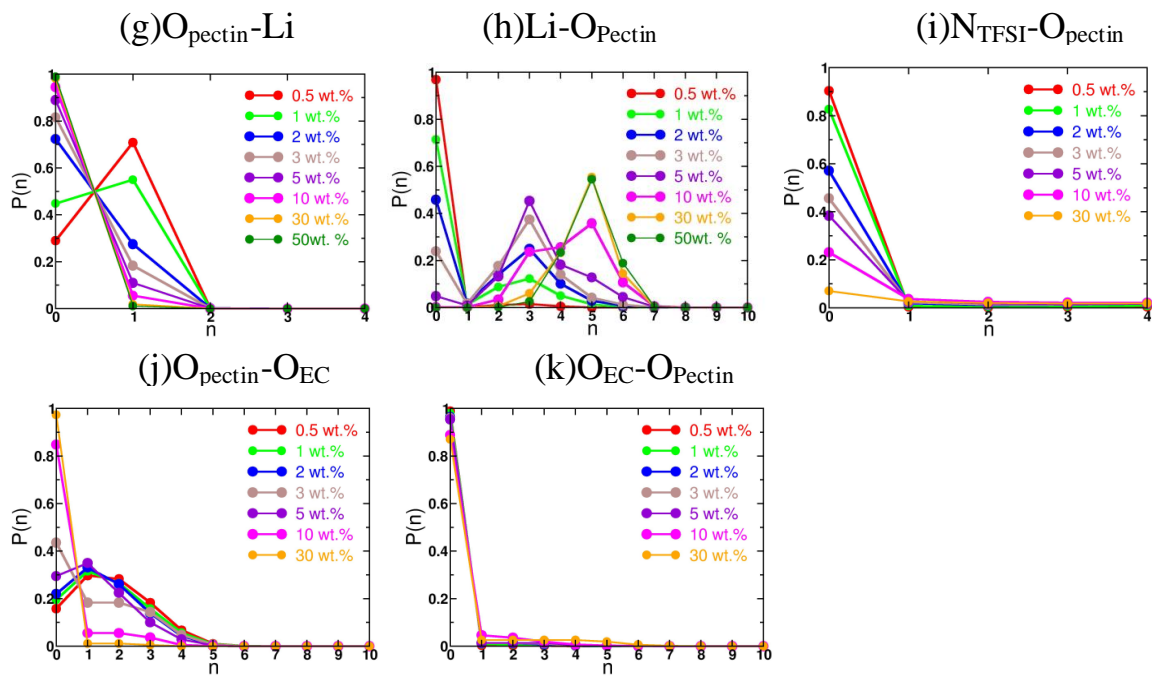

**Figure S3:** Probability of TFSI<sup>-</sup> around Li<sup>+</sup> ions for different atomic pairs such as Li-N<sub>TFSI</sub>, Li-O<sub>EC</sub>, Li-O<sub>pectin</sub>, N<sub>TFSI</sub>-O<sub>pectin</sub>, O<sub>EC</sub>-N<sub>TFSI</sub>, O<sub>pectin</sub>-O<sub>EC</sub> etc.

### S4: Mean Squared Displacements

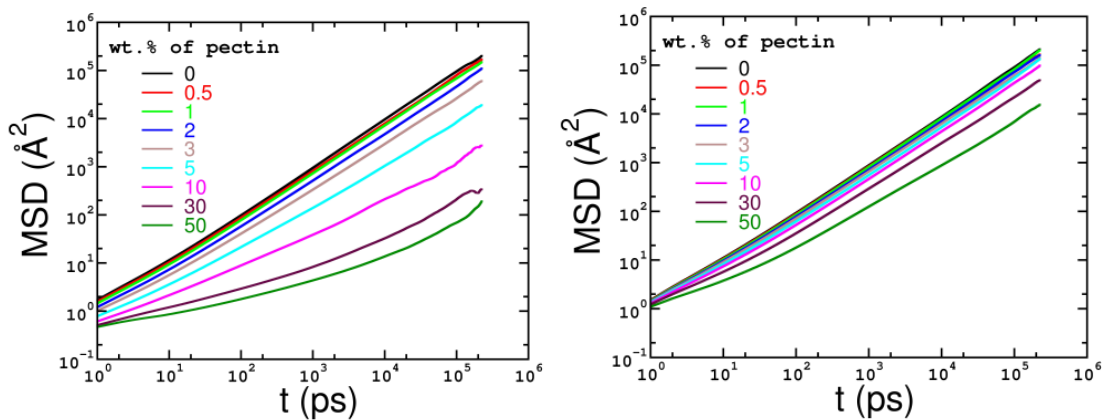

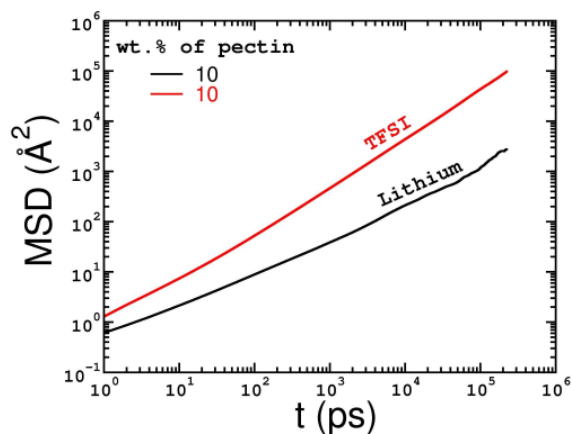

**Figure S4:** Mean square displacement of (a)  $\text{Li}^+$  (b) TFSI $^-$  for all wt.%, and (c) comparison of both  $\text{Li}^+$  and TFSI $^-$

**Table ST3: Diffusion Coefficient Calculations from MSD curves**

| wt. % of pectin | Exponent $\lambda$ in $\text{MSD}(t) \sim t^\lambda$ | Range used for fitting | MSD (slope) ( $\text{\AA}^2/s$ ) | $D_{\text{Li}}$ ( $\text{cm}^2/s$ ) |
|-----------------|------------------------------------------------------|------------------------|----------------------------------|-------------------------------------|
| 0               | 1.04                                                 | (179-223) ns           | 0.95                             | 1.58E-05                            |
| 0.5             | 0.94                                                 | (97-162) ns            | 0.85                             | 1.41E-05                            |
| 1               | 1.04                                                 | (190-223) ns           | 0.66                             | 1.10E-05                            |
| 2               | 1.07                                                 | (186-222) ns           | 0.48                             | 7.97E-06                            |
| 3               | 0.94                                                 | (188-222) ns           | 0.27                             | 4.49E-06                            |
| 5               | 1.10                                                 | (137-198) ns           | 0.092                            | 1.53E-06                            |
| 10              | 1.06                                                 | (122-181) ns           | 0.01                             | 2.17E-07                            |
| 30              | 1.02                                                 | (85-140) ns            | 0.002                            | 3.54E-08                            |
| 50              | 0.96                                                 | (101-158) ns           | 0.0005                           | 9.40E-09                            |

| wt. % of pectin | Exponent $\lambda$ in $\text{MSD}(t) \sim t^\lambda$ | Range used for fitting | MSD (slope) ( $\text{\AA}^2/s$ ) | $D_{\text{TFSI}}$ ( $\text{cm}^2/s$ ) |
|-----------------|------------------------------------------------------|------------------------|----------------------------------|---------------------------------------|
|-----------------|------------------------------------------------------|------------------------|----------------------------------|---------------------------------------|

|     |      |              |      |          |
|-----|------|--------------|------|----------|
| 0   | 1.06 | (168-220) ns | 0.92 | 1.53E-05 |
| 0.5 | 0.94 | (145-200) ns | 0.77 | 1.28E-05 |
| 1   | 1.01 | (133-193) ns | 0.83 | 1.38E-05 |
| 2   | 0.99 | (141-210) ns | 0.72 | 1.20E-05 |
| 3   | 1.10 | (152-216) ns | 0.61 | 1.02E-05 |
| 5   | 1.10 | (194-224) ns | 0.53 | 8.85E-06 |
| 10  | 1.06 | (179-222) ns | 0.43 | 7.21E-06 |
| 30  | 1.00 | (174-223) ns | 0.22 | 3.65E-06 |
| 50  | 0.87 | (167-221) ns | 0.07 | 1.15E-06 |

### S5: Calculation of Viscosity and Notes on Numerical Issues

It is often desirable to compute the time autocorrelation functions (TACFs) by picking the lag-time logarithmically for computational efficiency-related code optimizations. However, when using such time autocorrelation functions in the integration, it is possible to overlook the numerical errors. In **Figure S5**, we show a typical normalized TACF,  $\langle P_{\alpha\beta}(t)P_{\alpha\beta}(0) \rangle / \langle P_{\alpha\beta}(0)P_{\alpha\beta}(0) \rangle$ , and its numerically obtained running integral of viscosity,  $\eta = \frac{V}{k_B T} \frac{1}{6} \sum_{\alpha\beta} \int_0^\infty d\tau \langle P_{\alpha\beta}(t)P_{\alpha\beta}(0) \rangle$  with different choices in picking the lagtimes and the number of data points in TACF. The results indicate that while a higher number of data points in TACF produce fewer errors when the lag-times are picked logarithmically, straightforward integration of TACF with linearly picked lag-times produces minimal errors in the calculation of  $\eta$ . Part of the Fortran code to calculate  $\eta$  is given below, for an interested reader, and the full code is available upon request. However, choosing longer trajectories and a large set of independent trajectories reduces further errors in  $\eta$ . In this paper, we chose 50 uncorrelated independent trajectories for sampling the  $\eta$  calculations.

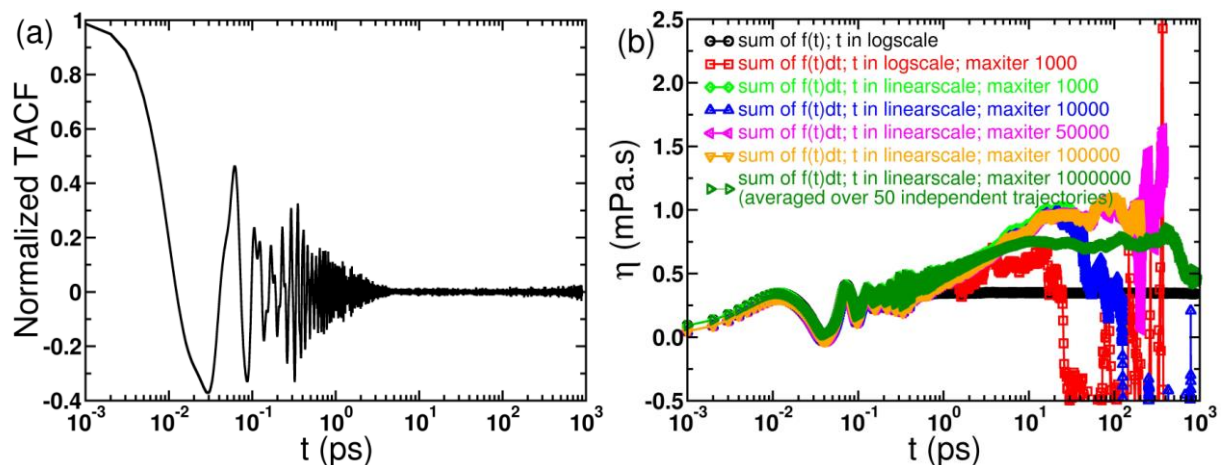

**Figure S5:** (a) Normalized time autocorrelation function, and (b) its numerical integration for pectin-EC-LiTFSI electrolytes at 0 wt. % of the pectin loading.

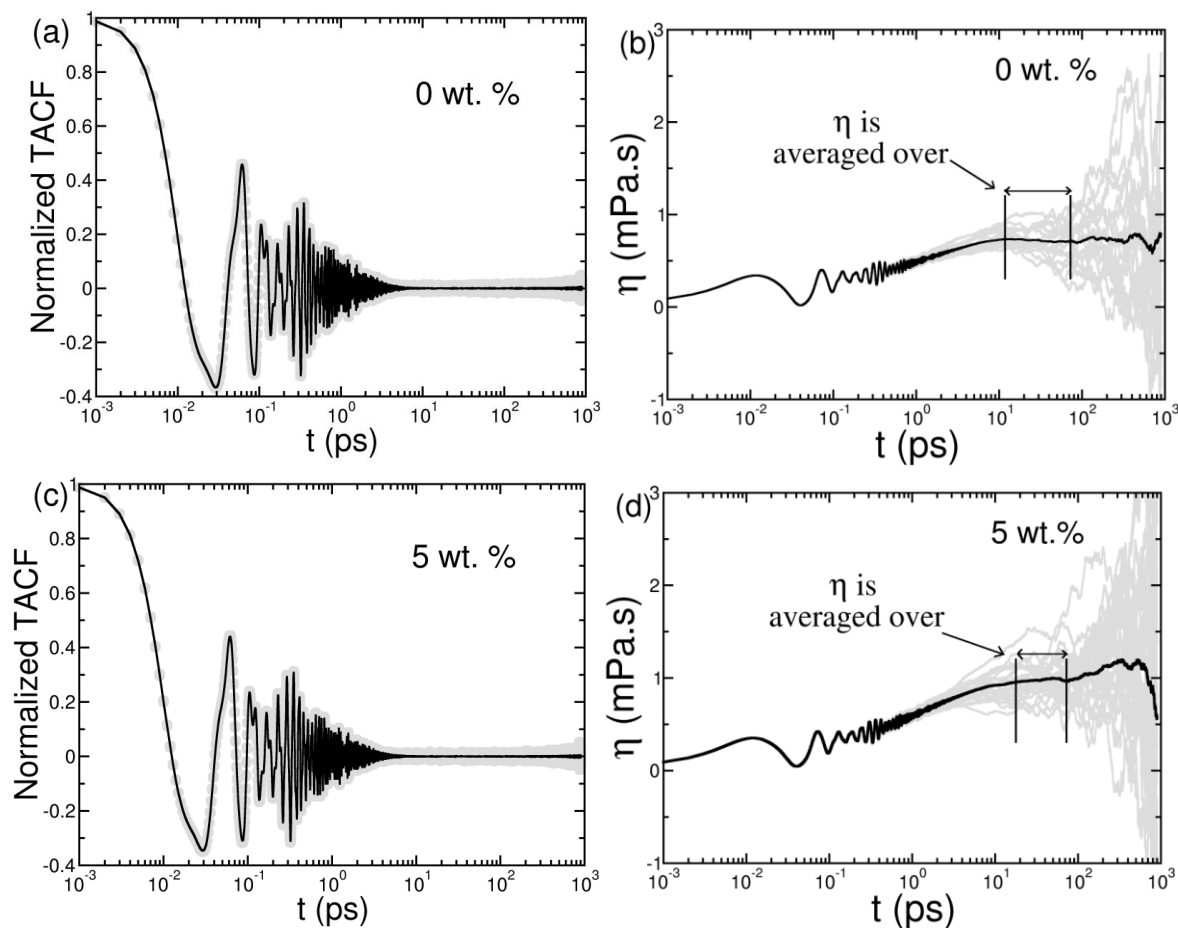

**Figure S6:** (a), (c) Average time autocorrelation function for 0 wt. % and 5 wt. % pectin loading and (b), (d) corresponding running integral from 50 independent trajectories.

**Fortran95 Code [full version is available on request]:**

!calculating viscosity

```
pxyacf=0.0d0
pxzacf=0.0d0
pyzacf=0.0d0
pyxacf=0.0d0
pzxacf=0.0d0
pzyacf=0.0d0
etaavg=0.0d0
etapxy=0.0d0
etapxz=0.0d0
etapyz=0.0d0
etapyx=0.0d0
etapzx=0.0d0
etapzy=0.0d0
r1=0.0d0
i1=0
tau=1
maxiter=min(10000,taumax)
do itau=1,maxiter
!do tau=1,taumax
tauold=tau
tau=nint(10.0d0**(r1)) !pick tau logarithmically increasing order:
r1=r1+log10(float(taumax))/maxiter
if(itau.eq.1.or.tau.gt.tauold)then
i1=i1+1
do k=1,nframes-tau
pxyacf(tau)=pxyacf(tau)+pxy(k)*pxy(k+tau-1)
pxzacf(tau)=pxzacf(tau)+pxz(k)*pxz(k+tau-1)
pyzacf(tau)=pyzacf(tau)+pyz(k)*pyz(k+tau-1)
pyxacf(tau)=pyxacf(tau)+pyx(k)*pyx(k+tau-1)
pzxacf(tau)=pzxacf(tau)+pzx(k)*pzx(k+tau-1)
pzyacf(tau)=pzyacf(tau)+pzy(k)*pzy(k+tau-1)
enddo !do k=1,nframes-tau
```

!normalize distacf

```
norm=(nframes-tau) !normalization for individual off-diagonal components of pressure tensor
pxyacf(tau)=pxyacf(tau)/norm
pxzacf(tau)=pxzacf(tau)/norm
pyzacf(tau)=pyzacf(tau)/norm
pyxacf(tau)=pyxacf(tau)/norm
pzxacf(tau)=pzxacf(tau)/norm
pzyacf(tau)=pzyacf(tau)/norm
pavgacf(tau)=pxyacf(tau)+pxzacf(tau)+pyzacf(tau)+pyxacf(tau)+pzxacf(tau)+pzyacf(tau)
```

```

    pavgacf(tau)=pavgacf(tau)/6.0d0 !normalization for pressure averaged over 6 off-diagonal
    components of pressure tensor
    ! write(poftopfid,'(f10.3,7f22.10)')(tau-
1)*timeperframe,pavgacf(tau),pxyacf(tau),pxzacf(tau),pyzacf(tau),pyxacf(tau),&
    ! &pzxacf(tau),pzyacf(tau)
    write(poftopfid,'(f10.3,7f15.10)')(tau-
1)*timeperframe,pavgacf(tau)/pavgacf(1),pxyacf(tau)/pxyacf(1),pxzacf(tau)/pxzacf(1),&
    &pyzacf(tau)/pyzacf(1),pyxacf(tau)/pyxacf(1),pzxacf(tau)/pzxacf(1),pzyacf(tau)/pzyacf(1)
    if(tau.eq.1)then
    write(*,*)
    write(*,*)"pavgacf(1),pxyacf(1),pxzacf(1),pyzacf(1),pyxacf(1),pzxacf(1),pzyacf(1)"
    write(*,'(7f22.10)')pavgacf(1),pxyacf(1),pxzacf(1),pyzacf(1),pyxacf(1),pzxacf(1),pzyacf(1)
    write(*,*)
    endif !if(tau.eq.1)then
    if(tau.eq.1.or.mod(i1,maxiter/10).eq.0)then
    call cpu_time(tf)

write(*,'(a7,2x,i8,2x,a2,2x,i8,2x,a1,1x,F10.2,2x,a26,2x,i8,2x,a7,2x,F10.2,2x,a7)')'POFT:',tau,'of',
nframes,',',&
    &100.0d0*float(tau)/(taumax-1),'% complete; Time taken for',tau,'tau is:',tf-ti,'seconds'
    endif
    dt=tau-tauold
    etaavg=etaavg+volumebykbt*pavgacf(tau)*unitconversion*dt
    etapxy=etapxy+volumebykbt*pxyacf(tau)*unitconversion*dt
    etapxz=etapxz+volumebykbt*pxzacf(tau)*unitconversion*dt
    etapyz=etapyz+volumebykbt*pyzacf(tau)*unitconversion*dt
    etapyx=etapyx+volumebykbt*pyxacf(tau)*unitconversion*dt
    etapzx=etapzx+volumebykbt*pzxacf(tau)*unitconversion*dt
    etapzy=etapzy+volumebykbt*pzyacf(tau)*unitconversion*dt
    write(etaofterfid,'(f10.3,7f22.10)')(tau-
1)*timeperframe,etaavg,etapxy,etapxz,etapyz,etapyx,etapzx,etapzy
    endif !if(itau.eq.1.or.tau.gt.tauold)then
    r1=r1+log10(float(taumax))/maxiter
    enddo !do itau=1,maxiter

```

## S6: Diffusion coefficient scaling with $\eta$ and $\tau_c$



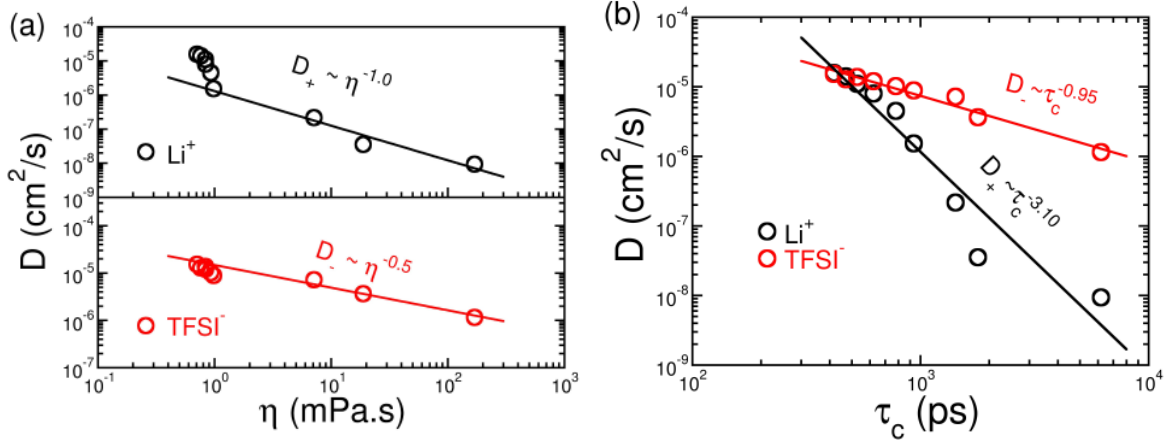

**Figure S7:** Direct comparison of the diffusion coefficient of  $\text{Li}^+$  and  $\text{TFSI}^-$  ions and their correlations with (a) viscosity and (b) ion-pair relaxation timescales.

In **Figures S7(a)** and **(b)**, we display the diffusivity of ions against the viscosity and ion-pair relaxation timescales, respectively. For the  $\text{Li}^+$  and  $\text{TFSI}^-$  ions, the diffusivity decreases with the viscosity and ion-pair relaxation timescales. Specifically, for the  $\text{TFSI}^-$  ions, by fitting diffusivities to respective power laws,  $D_- \sim \eta^{-\lambda}$  and  $D_- \sim \tau_c^{-\lambda}$ , we obtain the exponents of 0.5 and 0.95, respectively. Clearly, the  $D \sim \eta^{-\lambda}$  relation is violated for  $\text{TFSI}^-$  ions with viscosities (i.e.,  $D_- \sim \eta^{-0.5}$ ) but not with the ion-pair relaxation timescales (i.e.,  $D_- \sim \tau_c^{-0.95}$ ). The excellent correlations found between diffusivities of  $\text{TFSI}^-$  ions and ion-pair relaxation timescales are similar to those reported for traditional liquid electrolytes. However, for the  $\text{Li}^+$  ions, a similar analysis shows that  $D_+ \sim \eta^{-1}$  for higher loadings, obeying the  $D \sim \eta^{-\lambda}$  relation with viscosities. On the other hand, the diffusivity of  $\text{Li}^+$  ions with the ion-pair relaxations scales as  $D_+ \sim \tau_c^{-3.1}$ , violating the  $D \sim \tau_c^{-\lambda}$  relation.

By comparing the diffusivity of ions and viscosity, we found that the diffusivities of  $\text{TFSI}^-$  ions follow the power law,  $D_- \sim \eta^{-0.5}$ , revealing the violation of  $D \sim \eta^{-\lambda}$  relation with viscosities. Interestingly, the diffusivities of  $\text{Li}^+$  ions are observed to obey the  $D \sim \eta^{-\lambda}$  relation with viscosities, i.e.,  $D_+ \sim \eta^{-1}$  for higher loadings. Counterintuitively, the ion-pair relaxation timescales revealed opposite trends for the  $D \sim \tau_c^{-\lambda}$  relation. Explicitly, while the diffusivities of  $\text{TFSI}^-$  ions obey the  $D \sim \tau_c^{-\lambda}$  relation with ion-pair relaxation timescales (i.e.,  $D_- \sim \tau_c^{-0.95}$ ), the diffusivity of  $\text{Li}^+$  ions do not obey the  $D \sim \tau_c^{-\lambda}$  relation (i.e.,  $D_+ \sim \tau_c^{-3.1}$ ). The excellent correlations found between diffusivities of  $\text{TFSI}^-$  ions and ion-pair relaxation timescales are consistent with previous reports. The lithium ion diffusivity does not correlate with ion-pair relaxation time because the polymeric pectin units trap the lithium ions. The Nernst-Einstein conductivity scales with viscosity as  $\sigma_{NE} \sim \eta^{-0.56}$  and scales with ion-pair relaxation timescales as  $\sigma_{NE} \sim \tau_c^{-1.85}$ , revealing distinct transport mechanisms for ionic conductivity.

## S7: The Ion-pair Autocorrelation Function

We investigated the structural relaxation phenomena dictated by ion association to understand the transport mechanisms. To quantify the ion-association relaxation phenomena, we computed the ion-pair correlation function  $C(t)$ , which signifies the relaxation behavior of all ion associations. The ion-pair correlation function  $C(t)$  is defined as,

$$C(t) = \frac{\langle h(t)h(0) \rangle}{\langle h(0)h(0) \rangle}$$

The angular bracket  $\langle \cdot \cdot \cdot \rangle$  denotes an ensemble average that includes averaging over all ion-pairs and all possible time origins, and  $h(t)$  assigned a value unity if lithium and TFSI ions are found within a specified cutoff distance and zero otherwise.

**Figure S8.1 (a)** shows that the ion-pair relaxation time ( $\tau_c$ ) is highly affected by the loading of pectin. Specifically, we observed that ion-pair relaxation time increases with the increasing wt. % of pectin and, at 10 wt. % of pectin, it becomes almost 10 times higher than the ion-pair relaxation time of neat electrolyte.

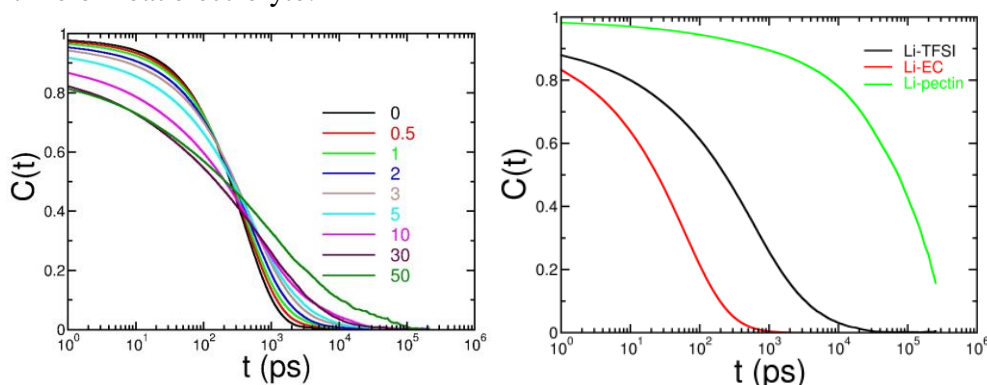

**Figure S8.1:** The ion-pair correlation function between  $\text{Li}^+$  and  $\text{TFSI}^-$  and (b) comparison of the time correlation function of Li-TFSI with Li-EC and Li-pectin at 10 wt. % of pectin loading.

We calculated the time correlation function and the corresponding relaxation times for atomic pairs between (a) Li and EC and (b) Li and pectin and compared the same with those of Li and TFSI pairs. We chose O04 as representative atom of EC and the most interacting oxygen O2 as the representative atom of pectin for calculating the time correlation functions (see **Figure S8.2**). Still, the number of oxygen atoms of EC and pectin molecules present in our pectin-loaded systems is very high, and hence the computational requirements in computing the time autocorrelation functions are huge due to some factors such as algorithmic complexity, pairwise computations, and memory requirements. Therefore, instead of calculating  $C(t)$  for all wt. %s of pectin, we choose only one system (at 10 wt.%) and compare the residence time between the Li-TFSI, Li-EC, and Li-pectin in **Figure S8.1b**. In brief, we observed that the  $C(t)$  for lithium-EC decays much faster compared to the  $C(t)$  of Li-TFSI pairs. On the other hand, the  $C(t)$  for lithium-pectin decays much slower compared to the  $C(t)$  of Li-TFSI pairs. Therefore, the relaxation timescales associated with the atomic pairs between (a) Li and EC, (b) Li and TFSI,

and (c) Li and pectin follows the trend:  $\tau_c(\text{Li-EC}) < \tau_c(\text{Li-TFSI}) \ll \tau_c(\text{Li-pectin})$  and the corresponding numbers are provided in **Table ST4**.

| wt. % of pectin | $\tau_c$ (Li-EC) in ps | $\tau_c$ (Li-TFSI) in ps | $\tau_c$ (Li-pectin) in ps |
|-----------------|------------------------|--------------------------|----------------------------|
| 10              | 78.3                   | 1308.0                   | 190487.8                   |

**Table ST4:** The relaxation time of Li-TFSI, Li-EC, and Li-pectin at 10 wt. % of pectin loading.

The above analysis clearly demonstrates that the relaxation or residence timescales of the cation near the polymer is very high due to the strong interaction between Li and pectin. Similarly, the relaxation or residence timescales of the cation near the solvent and anion is relatively low due to the respective weaker interactions due to the loading of pectin.

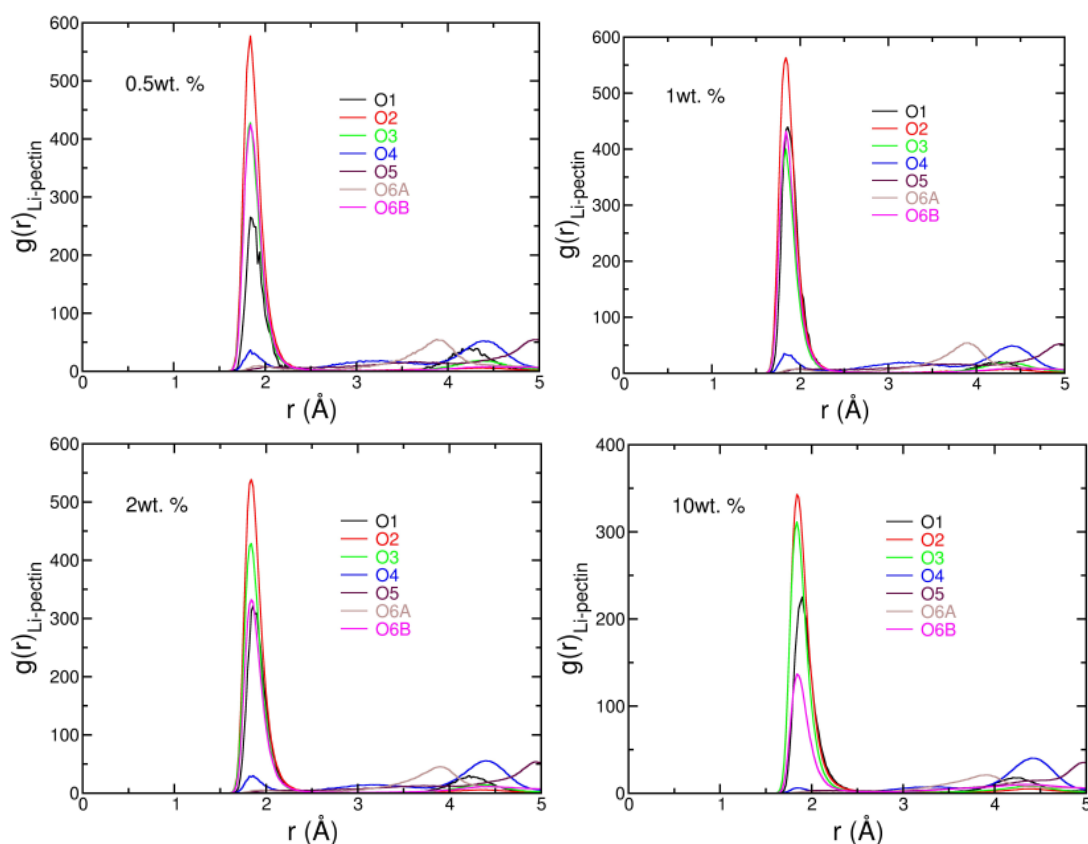

**Figure S8.2:** The RDF between Li and different oxygen atoms of pectin at different wt. % of pectin loading.

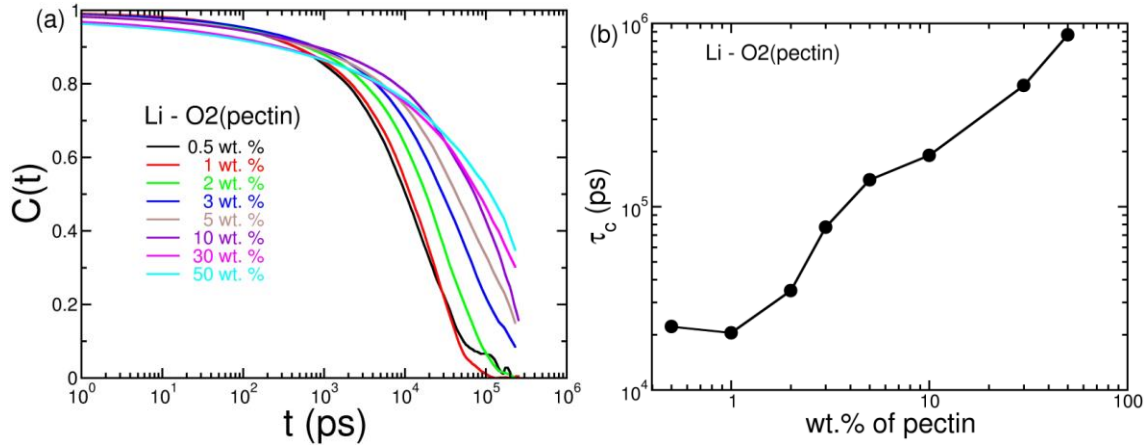

**Figure S8.3:** The Li-pectin correlation function and the corresponding residence time.

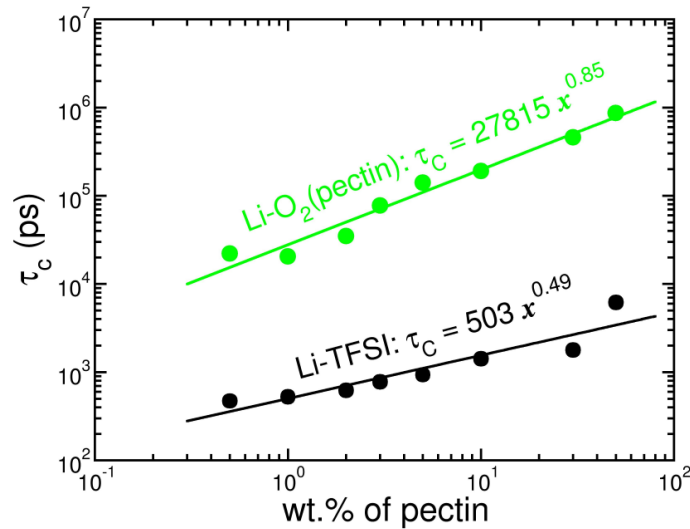

**Figure S8.4:** The residence time as a function of wt. % for Li-pectin and Li-TFSI fitted to equation  $y = a_0 x^{a_1}$

**S8: Pectin loading dependency of  $\sigma_{NE}, \eta, P(0), P(1)$  and  $P(2)$  and an intuitive objective function  $f(\sigma_{NE}, P(0), P(1)) \sim \sigma_{NE} P^a(0) / P^b(1)$**

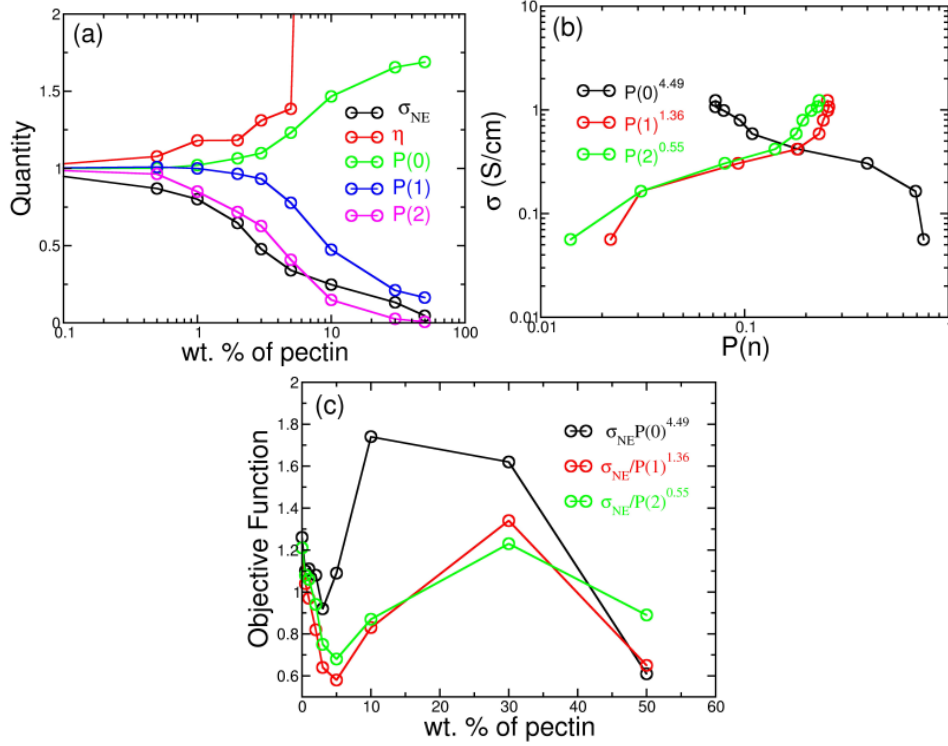

**Figure S9:** (a) The rate of change of  $\sigma_{NE}$ ,  $\eta$ ,  $P(0)$ ,  $P(1)$  and  $P(2)$  with the loading of pectin, (b)  $\sigma_{NE}$  as a function of ion association probability  $P(n = 1, 2, 3)$ , and (c) an intuitive objective function,  $f(\sigma_{NE}, P(0), P(1)) \sim \sigma_{NE} P^a(0)/P^b(1)$

## S9: Transference Number with wt. % of Pectin

To further understand how different ions contribute to conductivity, we have calculated the transference numbers for the  $\text{Li}^+$  and  $\text{TFSI}^-$  ions with varying loadings of pectin. The transference numbers are defined from the self-diffusion coefficients of ions:

$$t_{\text{Li}} = \frac{D_{\text{Li}}}{D_{\text{Li}} + D_{\text{TFSI}}}$$

$$t_{\text{TFSI}} = \frac{D_{\text{TFSI}}}{D_{\text{Li}} + D_{\text{TFSI}}}$$

Here,  $D_{\text{Li}}$  and  $D_{\text{TFSI}}$  are diffusion coefficients, and  $t_{\text{Li}}$  and  $t_{\text{TFSI}}$  are the transference numbers of  $\text{Li}^+$  and  $\text{TFSI}^-$  ions respectively. In **Figure S10**, we plotted the transference number with different wt. % of pectin loading. From quantitative transference number analysis, we find that the pectin-loaded EC-LiTFSI becomes a single ion conductor with wt. % of pectin loading as low as 10% as previously discussed in the diffusivity section. We see that our systems are excellent conductors for TFSI ions.

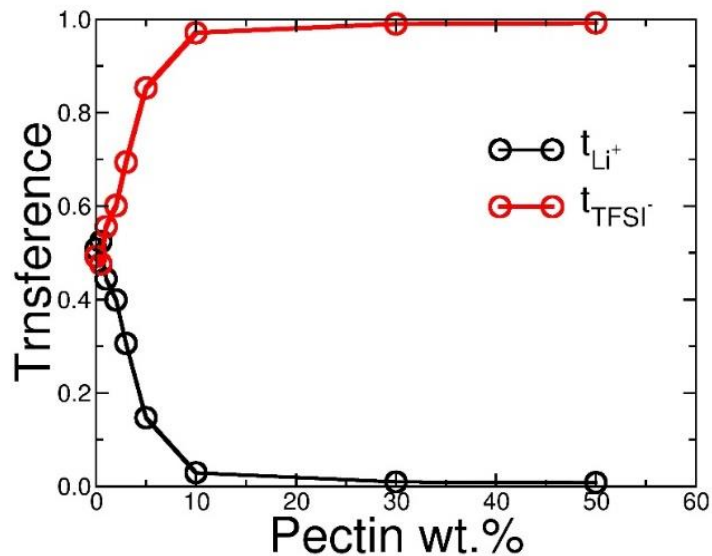

**Figure S10:** The calculated transference number of  $\text{Li}^+$  and  $\text{TFSI}^-$  ions for different wt.% of pectin-loaded systems from EMD simulations.

### References:

- <sup>1</sup> W. Humphrey, A. Dalke, and K. Schulten, *VMD: Visual Molecular Dynamics* (1996).
- <sup>2</sup> K.N. Kirschner, A.B. Yongye, S.M. Tschampel, J. González-Outeiriño, C.R. Daniels, B.L. Foley, and R.J. Woods, *J Comput Chem* **29**, 622 (2008).
- <sup>3</sup> Lindahl, Abraham, Hess, V. der Spoel, Lindahl, Abraham, Hess, and V. der Spoel, *Zndo* (2020).
